# Supplementary material for: Dissimilatory Nitrate Reduction to Ammonium in the Yellow River Estuary: Rates, Abundance, and Community Diversity
Source: PubMed Central journal article supplement (PMC5533712; doi:10.1038/s41598-017-06404-8), 2017-07-28

## Supplementary Information

### **Dissimilatory Nitrate Reduction to Ammonium in the Yellow River Estuary: Rates, Abundance, and Community Diversity**

Cuina Bu, Yu Wang, Chenghao Ge, Hafiz Adeel Ahmad, Baoyu Gao, Shou-Qing Ni \*

*Shandong Provincial Key Laboratory of Water Pollution Control and Resource Reuse,  
School of Environmental Science and Engineering, Shandong University, Jinan  
250100, China*

\*Corresponding author: Shou-Qing Ni, School of Environmental Science and  
Engineering, Shandong University, Jinan, Shandong, PR China, 250100. E-mail:  
[sqni@sdu.edu.cn](mailto:sqni@sdu.edu.cn).

## Supplementary Figures

### Legends for Supplementary Figure

**Supplementary Figure 1.** Venn diagram of OTUs in the four sites of the Yellow River Estuary.

**Supplementary Figure 2.** Rank abundance curve based on *nrfA* sequencing in the Yellow River Estuary.

**Supplementary Figure 3.** Functional gene abundance of two dissimilatory nitrate reduction processes (DNRA and Denitrification) in the Yellow River Estuary. Genes include *nirS* (cytochrome cd1 nitrite reductase), *nirK* (copper containing nitrite reductase), *nosZ* (nitrous oxide reductase) and *nrfA* (periplasmic nitrite reductase). Error bars represent standard deviation.

**Supplementary Figure 4.** Sampling sites in the Yellow River Estuary, Shandong, China. The figure was generated according to the distribution of land, sea and river using Adobe Photoshop CS5 (<http://www.52z.com/soft/23642.html>).

**Supplementary Figure 5.** Bioinformatic pipeline of *nrfA* pyrosequencing analysis.

**Supplementary Table 1.** Environmental parameters of bottom water and sediment in the five sites of the Yellow River Estuary.

| Study site   |                                                   | 1(mouth) | 2      | 3      | 4      | 5      |
|--------------|---------------------------------------------------|----------|--------|--------|--------|--------|
| Bottom water | Depth (m)                                         | 1.3      | 2      | 4      | 3      | 5      |
|              | Temperature (°C)                                  | 25.0     | 23.4   | 21.0   | 20.8   | 20.6   |
|              | Salinity (‰)                                      | 22.1     | 21.3   | 7.7    | 5.1    | 4.2    |
|              | pH                                                | 7.94     | 7.94   | 8.08   | 8.03   | 8.05   |
|              | DO (mg/L)                                         | 8.92     | 9.19   | 10.31  | 9.90   | 9.76   |
|              | NO <sub>3</sub> <sup>-</sup> (μM)                 | 102.86   | 159.29 | 229.29 | 269.29 | 272.14 |
|              | NH <sub>4</sub> <sup>+</sup> (μM)                 | 155.71   | 118.57 | 110.71 | 110.71 | 118.57 |
| Sediment     | Moisture content (%)                              | 20.76    | 23.62  | 28.22  | 22.07  | 45.11  |
|              | Organic carbon (g/kg)                             | 3.60     | 4.28   | 5.37   | 3.95   | 6.71   |
|              | Extractable NH <sub>4</sub> <sup>+</sup> (μmol/g) | 0.28     | 0.10   | 0.40   | 0.18   | 0.81   |

**Supplementary Table 2.** DO saturation in the five sites of the Yellow River Estuary.

| Study site | Temperature<br>°C | DO<br>mg/L | DO saturation<br>% |
|------------|-------------------|------------|--------------------|
| 1          | 25.0              | 8.92       | 108                |
| 2          | 23.4              | 9.19       | 107                |
| 3          | 21.0              | 10.31      | 116                |
| 4          | 20.8              | 9.90       | 111                |
| 5          | 20.6              | 9.96       | 112                |

**Supplementary Table 3.** DNRA rate and *nrfA* gene abundance in the five sampling sites of the Yellow River Estuary. ds: dry sediment.

| Study site | DNRA rate<br>nmoles N g <sup>-1</sup> h <sup>-1</sup> | <i>nrfA</i> gene<br>copies g <sup>-1</sup> ds |
|------------|-------------------------------------------------------|-----------------------------------------------|
| 1          | 0.19                                                  | $3.19 \times 10^9 \pm 1.38 \times 10^8$       |
| 2          | 0.10                                                  | $6.00 \times 10^9 \pm 5.81 \times 10^8$       |
| 3          | 1.52                                                  | $2.27 \times 10^{10} \pm 1.75 \times 10^9$    |
| 4          | 0.21                                                  | $8.65 \times 10^9 \pm 1.61 \times 10^8$       |
| 5          | 3.29                                                  | $1.74 \times 10^{10} \pm 9.27 \times 10^7$    |

**Supplementary Table 4.** Number of *nrfA* sequences, richness and diversity in the Yellow River Estuary.

| Study site | Valid reads | High quality reads | OTUs  | Chao 1 | ACE     | Simpson | Shannon |
|------------|-------------|--------------------|-------|--------|---------|---------|---------|
| 1          | 114,138     | 104,395            | 4,511 | 3,680  | 3680.00 | 0.9907  | 9.34    |
| 2          | 169,444     | 145,453            | 5,699 | 4,512  | 5256.75 | 0.9906  | 9.04    |
| 3          | 205,444     | 174,960            | 6,022 | 5,068  | 6316.29 | 0.9895  | 9.12    |
| 5          | 205,114     | 165,790            | 6,093 | 5,240  | 6444.56 | 0.9926  | 9.36    |

**Supplementary Table 5.** OTUs classification at different levels.

| Study site | Phylum | Class | Order | Family | Genus | Species |
|------------|--------|-------|-------|--------|-------|---------|
| 1          | 21     | 47    | 55    | 77     | 106   | 121     |
| 2          | 25     | 55    | 68    | 86     | 114   | 128     |
| 3          | 25     | 58    | 65    | 78     | 102   | 116     |
| 5          | 23     | 54    | 61    | 72     | 95    | 107     |

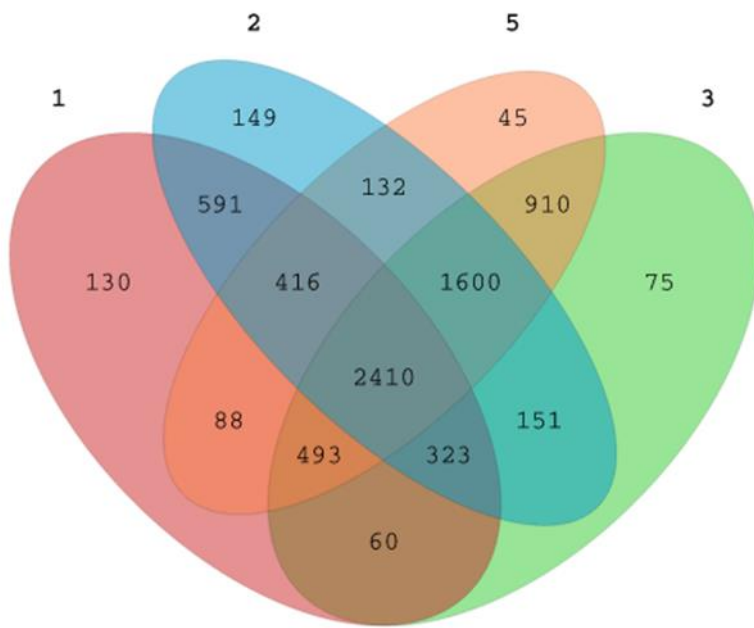

**Supplementary Figure 1.** Venn diagram of OTUs in the four sites of the Yellow River Estuary.

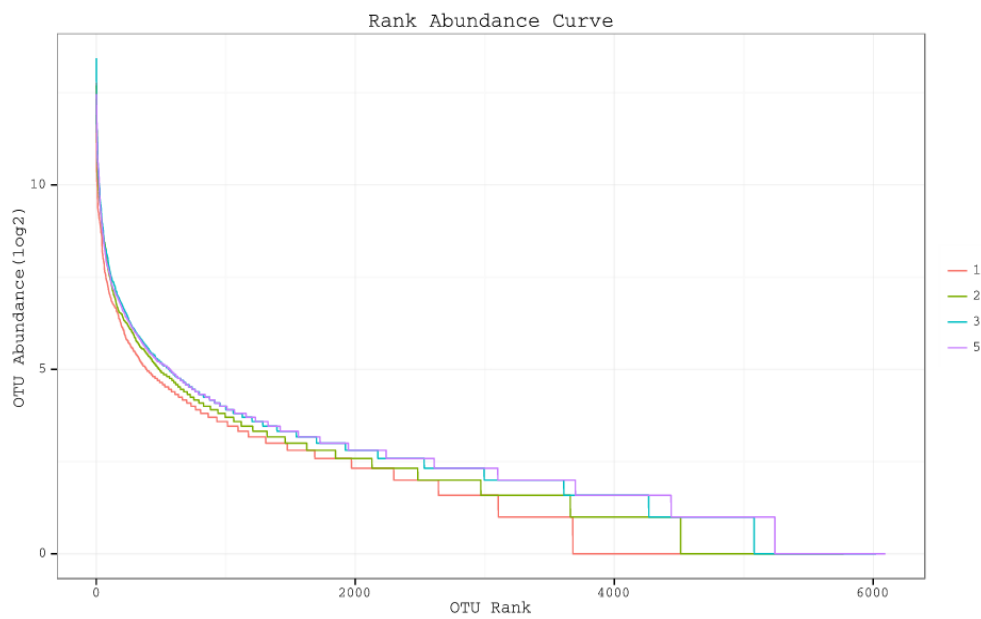

**Supplementary Figure 2.** Rank abundance curve based on *nrfA* sequencing in the Yellow River Estuary.

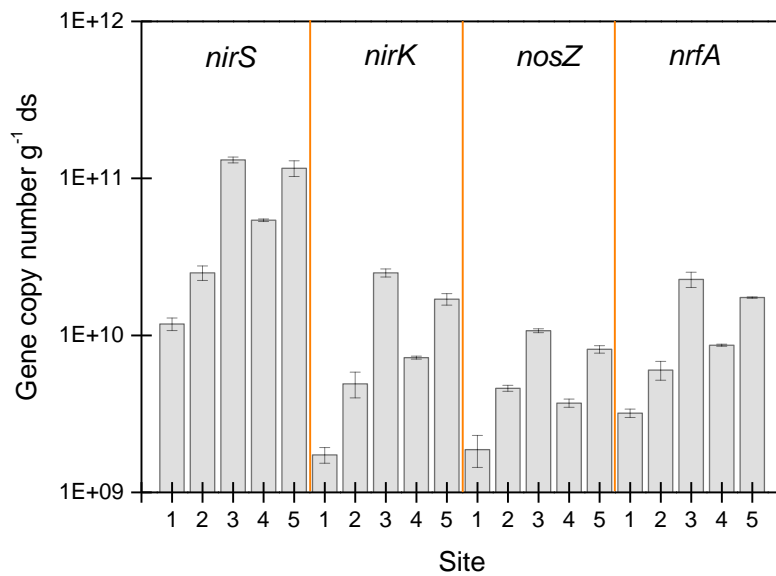

**Supplementary Figure 3.** Functional gene abundance of two dissimilatory nitrate reduction processes (DNRA and Denitrification) in the Yellow River Estuary. Genes include *nirS* (cytochrome cd1 nitrite reductase), *nirK* (copper containing nitrite reductase), *nosZ* (nitrous oxide reductase) and *nrfA* (periplasmic nitrite reductase). Error bars represent standard deviation.

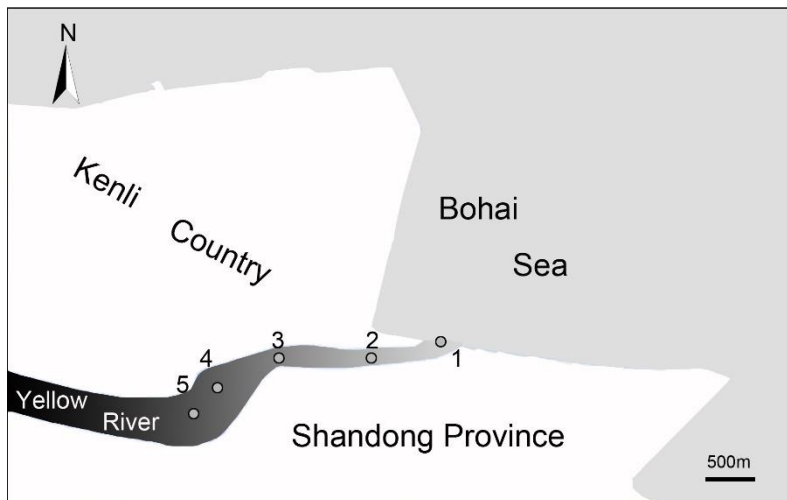

**Supplementary Figure 4.** Sampling sites in the Yellow River Estuary, Shandong, China. The figure was generated according to the distribution of land, sea and river using Adobe Photoshop CS5 (<http://www.52z.com/soft/23642.html>).

**Supplementary Figure 5.** Bioinformatic pipeline of *nrfA* pyrosequencing analysis

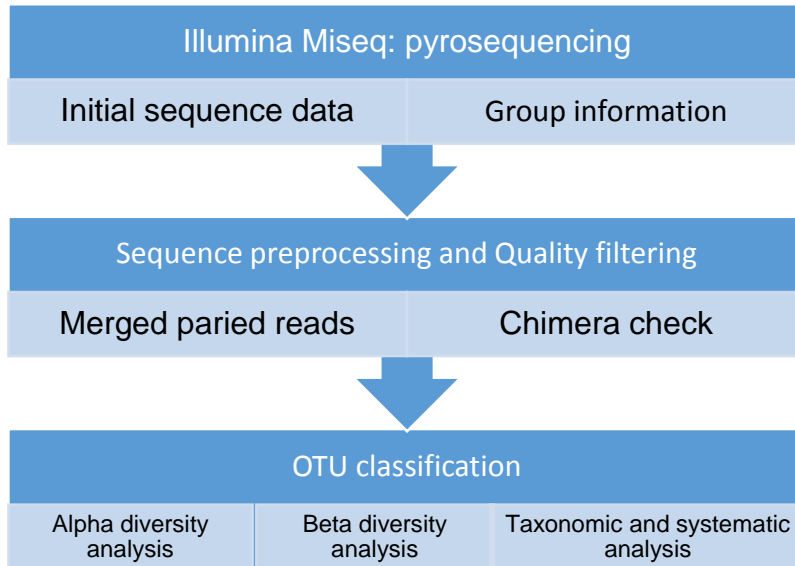

Supplement: 41598_2017_6404_MOESM1_ESM.pdf [file 41598_2017_6404_MOESM1_ESM.pdf]
